# Supplementary material for: Pathways and mechanisms of improving carbon and nitrogen conversion by core fungal community driven during co-composting of spent mushroom substrate and corn steep liquor
Source: Research Square preprint supplement (doi:10.21203/rs.3.rs-2377342/v1), 2023-01-11
Supplement: Supplementary file 1 [file e5d9690a5b02b95a0b881b3a.docx]

**Supplementary tables**

**Fig.S1** Temperature change with time during composting. CK:100% spent mushroom substrate (SMS); CP: CK+0.5% corn steep liquor(CSL).

**Table S1** Changes of physico-chemical parameters

| Treatment | TN （g.kg-1） | NH4+ （mg.kg-1） | NO3- （mg.kg-1） | TOC （g.kg-1） | pH | C/N |
| --- | --- | --- | --- | --- | --- | --- |
| CK1 | 14.53±0.18c | 111.16±0.43ef | 1977.86±78.93c | 169.04±3.23d | 7.92±0.01a | 11.63±0.27b |
| CK3 | 13.17±0.30cd | 216.13±12.27b | 1667.57±34.15d | 157.44±8.73e | 7.78±0.02b | 11.96±0.84b |
| CK17 | 13.93±1.14c | 270.90±15.60a | 2240.63±27.50c | 172.24±5.29d | 7.79±0.03b | 12.43±1.34b |
| CK36 | 14.52±0.31c | 125.27±8.15de | 3740.36±116.30a | 145.16±8.44f | 7.49±0.01e | 10.00±0.71c |
| CP1 | 17.21±0.43a | 146.56±4.29c | 1323.73±122.20e | 235.11±4.90a | 7.65±0.00d | 13.67±0.38a |
| CP3 | 16.11±0.16b | 150.03±4.52c | 1218.90±75.05e | 229.80±4.95ab | 7.73±0.02c | 14.26±0.30a |
| CP17 | 16.84±0.18ab | 137.40±4.63cd | 2061.72±313.40c | 209.89±0.52c | 7.49±0.01e | 12.47±0.13b |
| CP36 | 16.21±0.31b | 98.04±18.55f | 2680.9±200.00b | 221.18±1.91b | 7.32±0.02f | 13.65±0.36a |

*TN* total nitrogen; *TOC* total organic carbon; *C/N* TOC/TN.

**Table S2** The abundance of dominant fungus phylum

| Treatment | Ascomycota | Basidiomycota | Chytridiomycota | Neocallimastigomycota | Mortierellomycota | Unassigned |
| --- | --- | --- | --- | --- | --- | --- |
| CK1 | 0.23±0.20c | 99.67±0.35a | 0.00±0.00a | 0.00±0.00a | 0.00±0.00b | 0.12±0.20c |
| CK3 | 1.49±0.53c | 97.27±1.23ab | 0.69±0.69a | 0.12±0.20a | 0.12±0.20b | 0.35±0.35c |
| CK17 | 45.17±17.90ab | 46.90±16.77cd | 1.84±0.80a | 0.35±0.00a | 2.41±1.20b | 3.22±2.25abc |
| CK36 | 65.17±16.62a | 20.22±16.88de | 2.30±1.63a | 0.81±0.53a | 10.11±2.10a | 1.38±0.60bc |
| CP1 | 27.37±19.34bc | 66.53±21.22bc | 0.80±0.86a | 0.69±0.34a | 0.69±0.91b | 3.91±1.40ab |
| CP3 | 72.07±19.68a | 10.11±4.32e | 1.49±2.59a | 1.26±2.19a | 9.88±8.09a | 5.0±4.17ab |
| CK17 | 41.17±33.05ab | 57.13±34.25c | 0.12±0.20a | 0.46±0.52a | 0.23±0.40b | 0.92±0.80c |
| CK36 | 18.74±11.89bc | 78.17±11.04abc | 2.07±3.29a | 0.00±0.00a | 0.80±0.72b | 0.23±0.40c |

**Table S3** The abundance of dominant fungus genus

| Treatment | Unassigned | Mortierella | Trichoderma | Thermomyces | Coprinopsis | Penicillium | Duddingtonia | Coniochaeta |
| --- | --- | --- | --- | --- | --- | --- | --- | --- |
| CK1 | 99.8±0.17a | 0±0b | 0.12±0.20b | 0±0a | 0±0b | 0±0b | 0.12±0.20b | 0±0a |
| CK3 | 98.4±1.14a | 0.12±0.20b | 0.35±0.35b | 0±0a | 0±0b | 0.12±0.20b | 0.23±0.40b | 0±0a |
| CK17 | 50.7±19.49cd | 2.41±1.20b | 6.67±4.37ab | 0.92±1.00a | 0.46±0.80ab | 7.93±6.87a | 18.28±17.51a | 0.23±0.40a |
| CK36 | 28.97±11.52cde | 10.11±2.10a | 8.06±3.83ab | 0.69±0.34a | 0.12±0.20b | 1.38±1.03b | 16.67±4.27a | 0.12±0.20a |
| CP1 | 81.03±15.27ab | 0.69±0.91b | 5.63±6.58ab | 5.04±4.61a | 0.23±0.20b | 0.23±0.20b | 0.46±0.40b | 0.12±0.20a |
| CP3 | 14.83±3.62e | 9.88±8.09a | 32.51±44.08a | 9.63±7.74a | 1.27±0.87a | 0.12±0.20b | 0.12±0.20b | 0±0a |
| CP17 | 66.33±21.00bc | 0.23±0.40b | 1.84±2.89b | 13.34±21.62a | 0.58±0.72ab | 8.26±6.57a | 0±0b | 0.23±0.20a |
| CP36 | 80.7±12.13ab | 0.80±0.71b | 0.35±0b | 1.49±0.80a | 0.12±0.20b | 3.91±2.97ab | 11.61±11.47ab | 0±0a |

**Table S4** Key topological features of fungal communities in CK and CP

| key features | CK | CP |
| --- | --- | --- |
| Average Degree | 3.053 | 1.867 |
| Average Weighted Degree | 2.857 | 1.779 |
| Diameter | 4 | 2 |
| Radius | 1 | 1 |
| Average Path length | 1.6471 | 1.2222 |
| Density | 0.17 | 0.133 |
| Number of Weakly Connected Compents | 5 | 5 |
| Average Clustering Coefficient | 0.654 | 0.939 |
| Total Triangles | 28 | 4 |
| Network Interpretation | undirected | undirected |
| Number of iterations | 100 | 100 |
| Sum change | 4.95E-04 | 0.00369504 |
| Modularity | 0.36 | 0.713 |
| Modularity with resolution | 0.36 | 0.713 |
| Number of Communities | 6 | 5 |
| Epsilon | 0.001 | 0.001 |
| Probability | 0.085 | 0.85 |
| Number of nodes | 19 | 15 |
| Number of edges | 29 | 14 |
